# Supplementary material for: Diagnostic and Prognostic Value of Soluble Syndecan-1 in Pleural Malignancies
Source: PubMed Central journal article supplement (PMC4131558; doi:10.1155/2014/419853), 2014-07-24
Supplement: 419853.f1.pdf [file 419853.f1.pdf]

## Supplementary material

This file has been provided by Mundt F, et al. to give supplementary information about their study:

### *Diagnostic and prognostic value of soluble syndecan-1 for pleural metastases and malignant pleural mesothelioma*

Index:

Figure S1, page 1

Figure S2, page 2

Figure S3, page 3

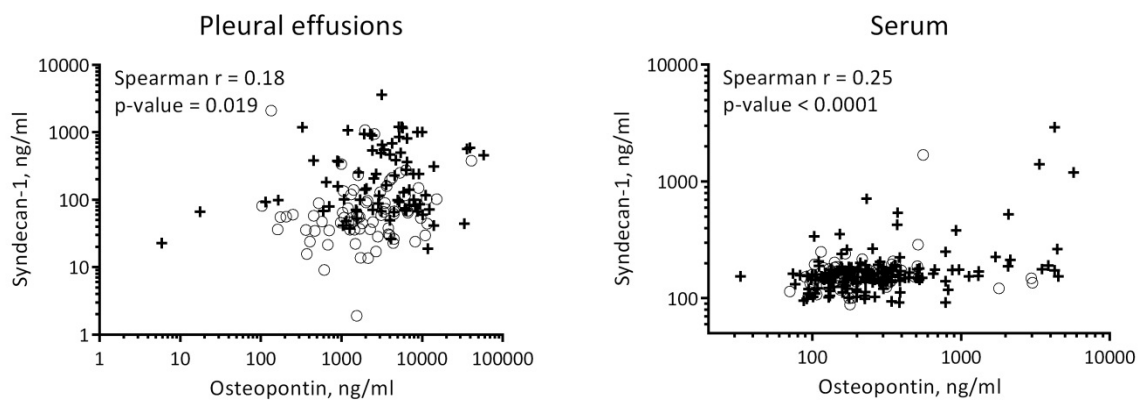

**Figure S1.** The correlation between syndecan-1 and osteopontin in pleural effusions and serum. Pluses (+) denote malignant cases, while circles denote patients with benign disease.

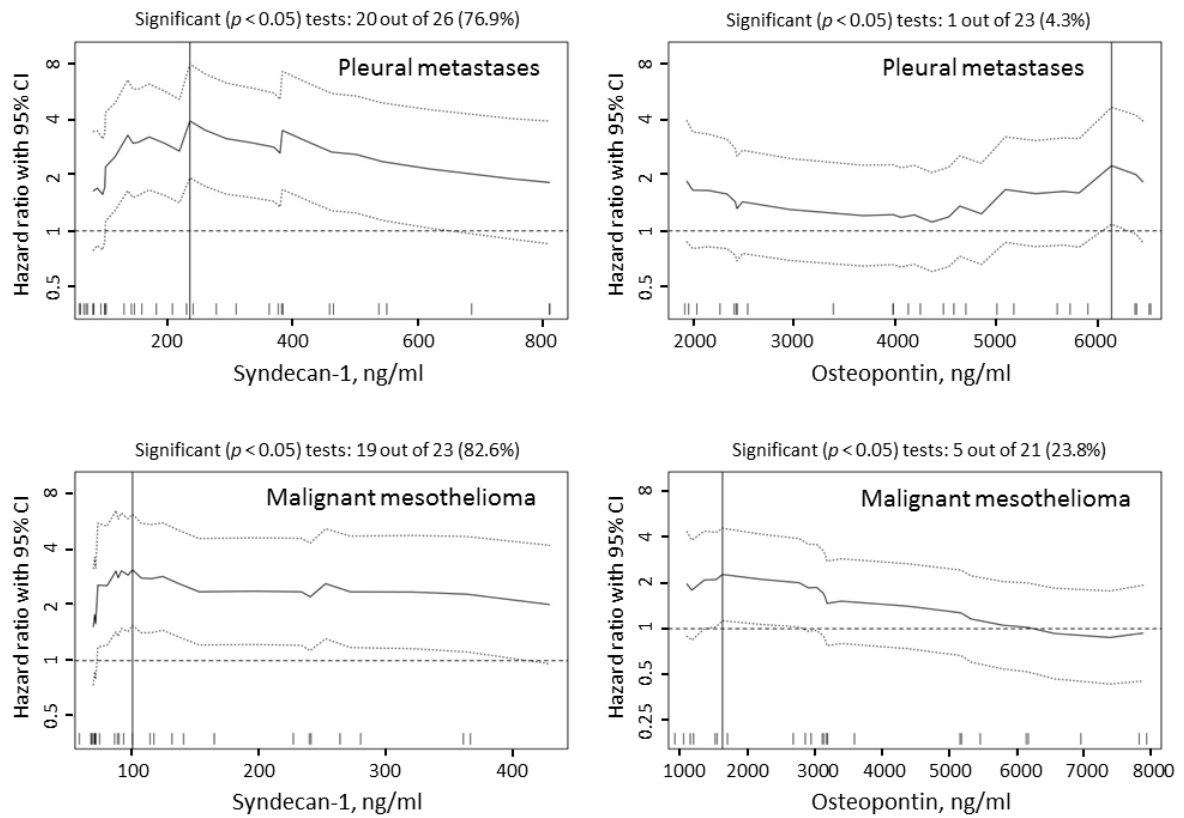

**Figure S2.** Hazard ratio and 95% confidence interval (95% CI; dotted lines), plotted over a continuum of either syndecan-1 or osteopontin concentrations. Calculations and graphs were created using the *Cutoff Finder* application (<http://molpath.charite.de/cutoff/>). Highest and most significant hazard ratio (vertical solid line) was subsequently chosen as cut-offs for Kaplan-Meier estimates.

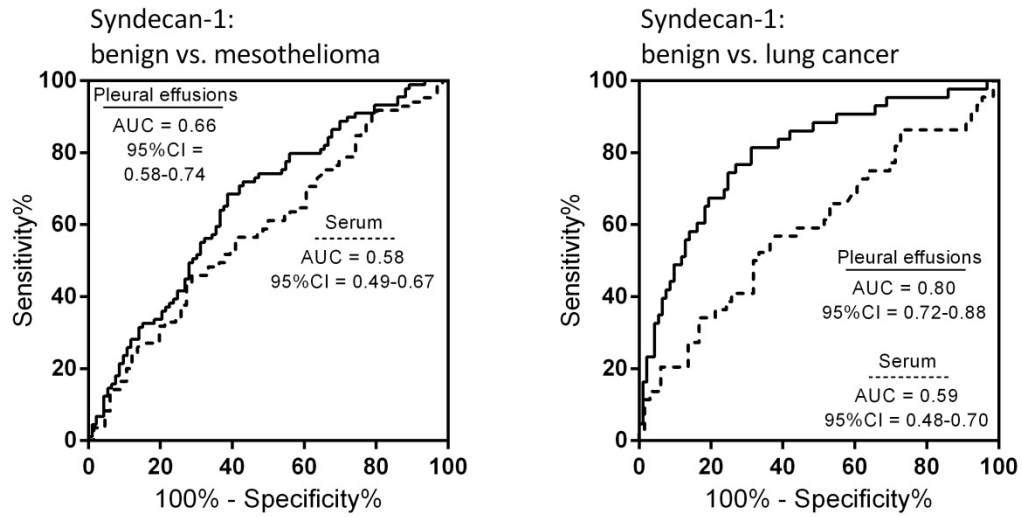

**Figure S3.** Receiver operating characteristic curves of subgroups showing syndecan-1's diagnostic value in pleural effusions or serum. Enough patients for statistically powerful analysis were present when comparing benign cases to patients with either malignant pleural mesothelioma or lung adenocarcinoma.
